# Supplementary material
Source: PubMed Central journal article supplement (PMC3935402)

S3.  $^1\text{H}$  NMR iterative full spin analysis of downfield regions of series A and B at 600 and 400 MHz, respectively, showing the detailed chemical shifts and coupling constants consistent with the relative configuration (unassigned signals belong to impurities)

Calculated  $^1\text{H}$  NMR Spectrum of Sample A

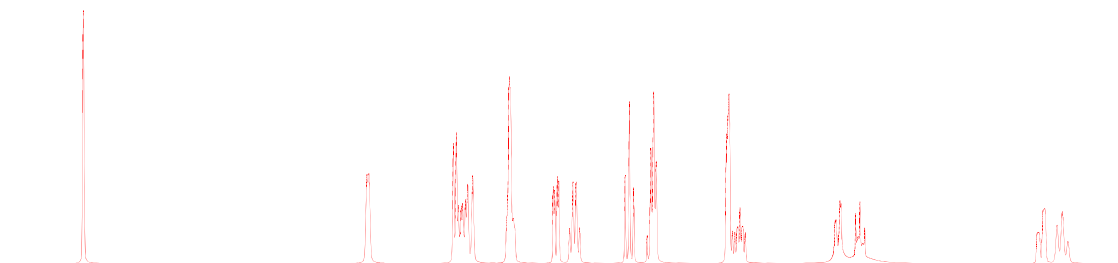

Experimental  $^1\text{H}$  NMR Spectrum of Sample A

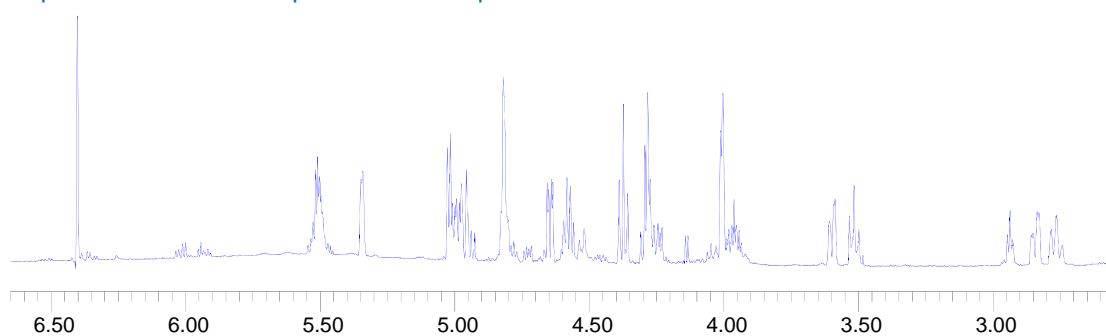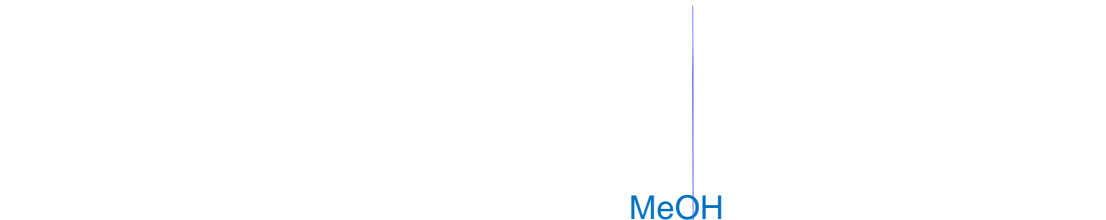

Calculated  $^1\text{H}$  NMR Spectrum of Sample B

Experimental  $^1\text{H}$  NMR Spectrum of Sample B

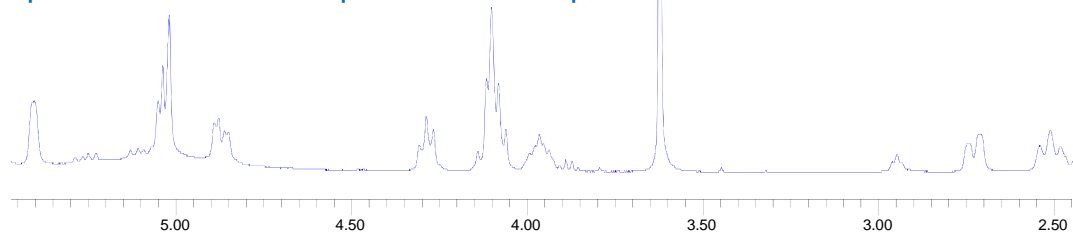

Supplement: NIHMS517087-supplement-03.pdf [file NIHMS517087-supplement-03.pdf]
