# Supplementary material
Source: PubMed Central journal article supplement (PMC3935402)

## S2. $^1\text{H}$ NMR iterative full spin analysis of diosgenin at 900 MHz

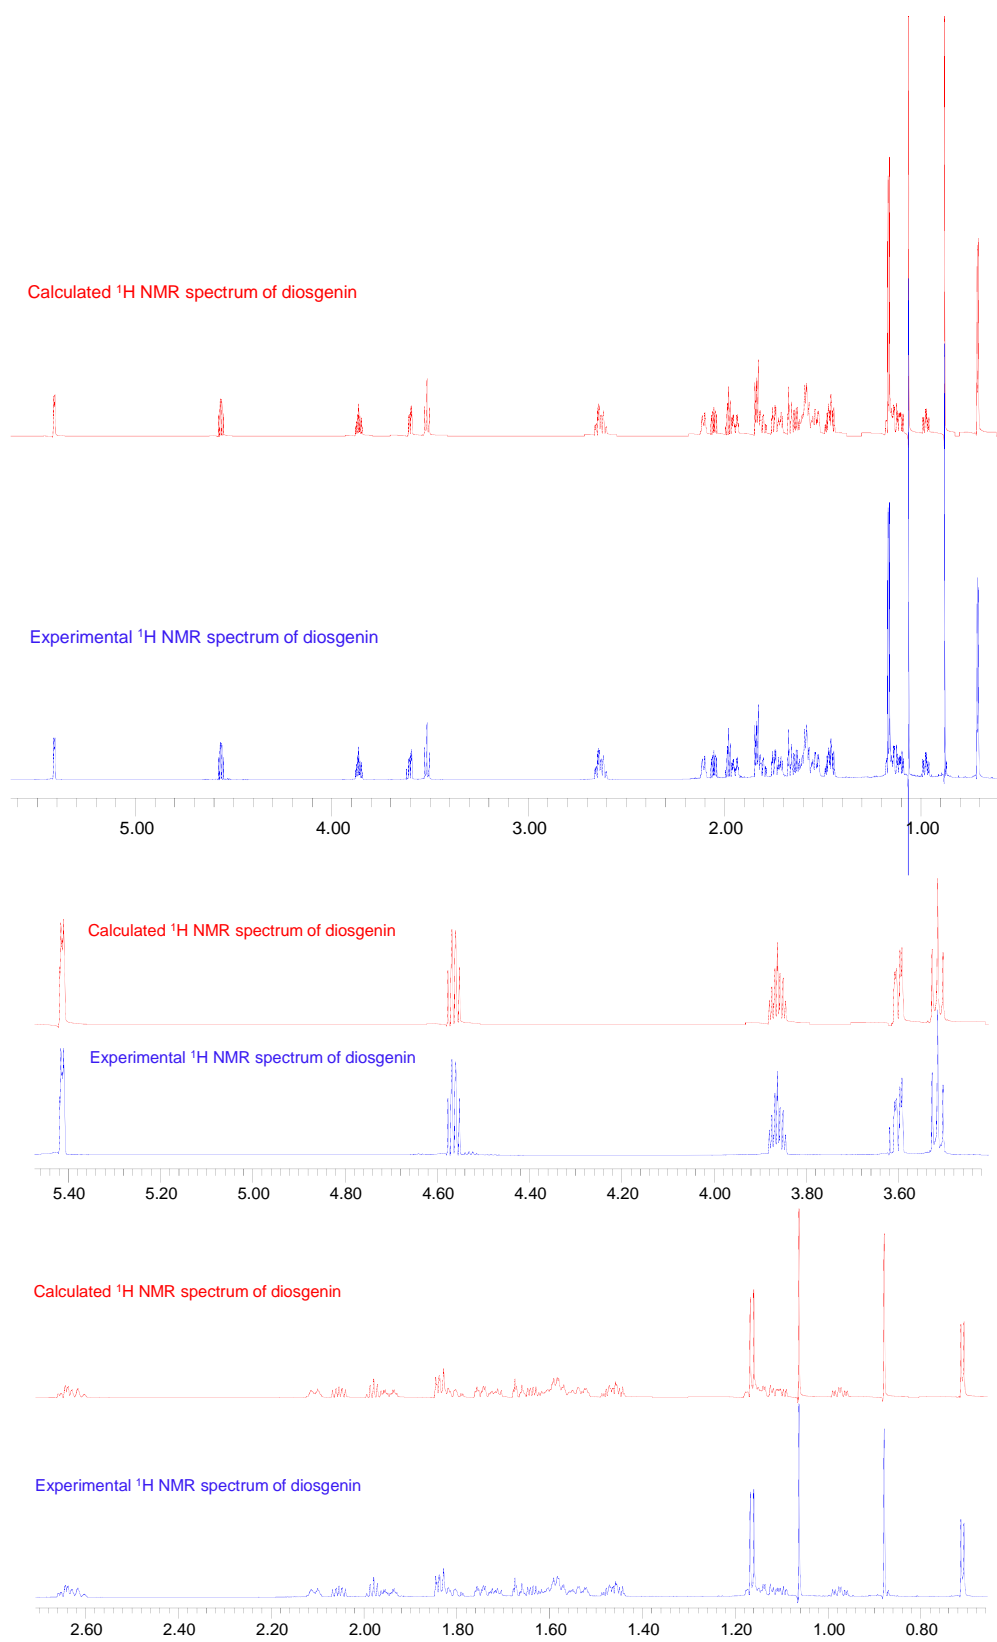

Supplement: NIHMS517087-supplement-02.pdf [file NIHMS517087-supplement-02.pdf]
